# Supplementary material for: Emergence of modern-style continental subduction modulated by rifted margin-subduction feedback
Source: Research Square preprint supplement (doi:10.21203/rs.3.rs-2924524/v1), 2023-07-05
Supplement: Supplementary file 1 [file 8b32b4acfe5bb108e279f6a8.xlsx]

## Sheet: Sheet1
Number	Margin and orogen	Where	Start date (Ma)	End date (Ma)	Lifespan (m.y.)	Quality	Length (km)	Mafic rocks	Thickness mafic rocks	Passive margin stratigraphy
A1	Arctic Alaska microcontinent, S side, Brookian orogen	Alaska, Russia	350	170	180	A	1230	none	-	The Mesozoic part of the passive margin sequence was dominated by cherts and siliciclastic rocks rather than carbonates
A2	Farewell terrane	Alaska	545	435	110	C	460	none	-	Paleozoic carbonate platform and a coeval off-shelf succession to the east.
A3	Laurentian craton, W side, northern sector, Antler orogen	Canada	710	385	325	B	1560	moderate	Neoproterozoic to Early Cambrian siliciclastic strata and volcanic rocks that accumulated during protracted rifting	The sedimentary cover includes: (1) local Mesoproterozoic strata of the intracratonic Belt basin; (2) Neoproterozoic to Early Cambrian siliciclastic strata and volcanic rocks that accumulated during protracted rifting; (3) Middle Cambrian to Devonian carbonate-rich strata deposited along a passive margin; and (4) Mississippian to Jurassic mixed siliciclastic and carbonate strata deposited during …
A4	Laurentian craton, W side, southern sector, Antler orogen	USA, Canada	542	357	185	A	1870	moderate	Neoproterozoic to Early Cambrian siliciclastic strata and volcanic rocks that accumulated during protracted rifting	The sedimentary cover includes: (1) local Mesoproterozoic strata of the intracratonic Belt basin; (2) Neoproterozoic to Early Cambrian siliciclastic strata and volcanic rocks that accumulated during protracted rifting; (3) Middle Cambrian to Devonian carbonate-rich strata deposited along a passive margin; and (4) Mississippian to Jurassic mixed siliciclastic and carbonate strata deposited during …
A5	Laurentian craton, N side, Innuitian margin, Ellesmerian orogen	Canada, Greenland	620	444	180*	C	1900	none	-	Carbonate-dominated, early Paleozoic continental terrane and a coeval deep-water slope-rise succession
A6	Slave craton, W side, Wopmay orogen	Canada	2015	1883	132	A	560	abundant	A thick pile of mafic pillow lava and hyaloclastite breccia forms the Vaillant Fm. (https://doi.org/10.1139/E10-038)	Coronation margin contains basement rocks of the Archean Slave craton overlain by a tripartite sedimentary succession representing three distinct tectonic regimes: rift, passive margin, and foredeep. The demise of the Coronation margin is marked by drowning of the platform, mafic magmatism, and influx of orogenically derived turbidites
A8	Laurentian craton, N side, Borden Basin, Poseidon orogen	Canada	1255	1200	55	C	270	moderate	Eqalulik Group, composed of a lower unit with about 300 m of massive and amygdaloidal basalt, quartzite, and tuff (ISBN: 978-1-4613-1795-1)	Bylot Supergroup, which consists of three groups from base to top: Eqalulik Group (mafic volcanic and siliciclastic rocks), Uluksan Group (carbonate rocks), and Nunatsiaq Group (siliciclastic rocks)
A9	Hearn craton, SE side	Canada	2070	1880	190	B	820	moderate	The Courtney Lake Group, at the base of the supracrustal succession, is composed of arkose, conglomerate, quartzite, minor pelite, and bimodal volcanic rocks	The Courtney Lake Group, at the base of the supracrustal succession, is composed of arkose, conglomerate, quartzite, minor pelite, and bimodal volcanic rocks. The overlying Souter Lake Group consists mostly of mature quartzites. This was followed by a succession of carbonates (Karin Lake Formation), then graphitic metapelite (George Lake Formation), and finally an upward-coarsening turbidite succ…
A10	Steep Rock Lake platform, Superior Craton, Wabigoon Province	Canada	Unk (< 3002)	Unk (< 2870)	Unk	D	15	abundant	The 100–400 m thick Dismal Ashrock is an unusual unit consisting of a mixture of ductily deformed mafic to ultramafic volcanic and sedimentary rocks (https://doi.org/10.1139/e98-108). The structurally highest unit at Steep Rock Lake is the Witch Bay Volcanics, 5 km of highly deformed mafic and minor felsic volcanic rocks	Conglomerate, sandstone, and pelite of Wagita Formation, which is overlain by 0 to 500 m of stromatolite-bearing carbonates (Mosher Carbonate).
A11	Wyoming Craton, S side, Medicine Bow orogen	USA	2000	1780	220	B	310	abundant	The Kennedy dikes occupy from 15 to 20% of a 100-km-wide exposure of Archean basement, and include diabasic, plagioclase-phyric, and peridotitic rock types. Diabase dikes can be traced for distances ranging from 10 m to 2 km, and they are from 0.5 m to 50 m in width (https://doi.org/10.2113/35.1.7)	Rift (Deer Lake Group), passive margin (lower Libby Creek Group), and possible foreland-basin deposits (upper Deer Lake Group)
A12	Superior craton, S side, Huronian margin, Penokean orogen	Canada, USA	2300	2065	235	C	1170	abundant	The Matachewan swarm, comprising many hundreds to thousands of dykes, fans northwards from a broad focus in the Lake Huron region. The median dyke width is about 20 m and the total amount of crustal extension across the full 400 km of the swarm is about 1-2%. The total volume of magma is about 100,000 km3 (https://doi.org/10.1016/0012-821X(91)90137-7)	The Huronian margin is mainly recorded in exposures north of Lake Huron by the Huronian (or Huron) Supergroup, a southward-thickening siliciclastic sedimentary prism as great as 12 km thick
A13	Superior craton, S side, Animike margin, Penokean orogen	Canada, USA	2065	1880	185	B	1170	abundant	Nipissing sills range in thickness from a few metres to several hundred metres (https://doi.org/10.1139/e89-038). The Fort Frances dyke swarm has a length of 300 km and a width of 400 km (DOI:10.1029/GM100).	The Animikie margin preserves no platformal sediments because it was a transform margin lacking thinned lithosphere
A14	Superior Craton, N side, Cape Smith and Trans-Hudson orogens	Canada	2000	1875	125	B	370	abundant	Rift sequence (Povungnituk Group) consists of 3 km of siliciclastic rocks overlain by 5 km of basalt and rare rhyolite	Rift sequence (Povungnituk Group) consists of 3 km of siliciclastic rocks overlain by 5 km of basalt and rare rhyolite
A15	Superior craton, E side, New Quebec orogen e (“Labrador Trough”)	Canada	2135	1890	245	B	960	abundant	In the centre of the Labrador Trough, the basaltic pile is about 5500 m thick (https://doi.org/10.1139/e93-136)	A basal rift sequence (Chakonipau Formation) of fluvial facies and basalt is intruded by a gabbro sill. An overlying marine platform that includes an extensive, undated dolomite unit. An unconformity of unknown duration divides the passive margin from a younger succession consisting of iron formation, turbidites, and mafic and felsic volcanic rocks.
A16	Nain craton, W margin, Torngat orogen	Canada	Unk (> 1876)	1859	Unk	D	290	moderate	The Volcanic Member is a 6 to 18 m, highly altered grey basalt lava flow which rests upon pebbly sandstones of the Lower Quartzite Member; it is the only volcanic unit in the Ramah Gp (ISBN 0-612 - 01835-0)	The lower one-third of the Ramah Group (Rowsell Harbour and Reddick Bight Formations) is a clastic-dominated shelf succession, consisting mostly of quartzite and mudstone. The upper two-thirds of the Ramah Group (Nullataktok, Warspite, Typhoon Peak, and Cameron Brook Formations) consists of a basinal succession deep-water carbonates, shales, minor pyritic iron formation, and at the top, turbiditi…
A17	Nain Craton, N side, Makkovik orogen	Canada	2175	2010	165	C	110	abundant	The Aillik domain also contains abundant pre- and post-deformational mafic dykes that intrude the entire map area	A succession of metasedimentary and mafic metavolcanic rocks, assigned to the Lower Aillik Group, is interpreted to represent a northern passive margin of the Nain craton.
A18	Laurentian craton, S side, Ouachita orogen	USA	520	310	210	A	1720	none	-	Flysch, then molasse, inundated the carbonate platform
A19 (a, b)	Laurentian craton, E side, Appalachian margin, Taconic orogen (a) and NW Scotland (b)	USA, Canada	540	465	75	A	3320	abundant	Tholeiitic mafic dikes are related to the flows and attest to significant extension; the dikes strike northeast, parallel to the eventual passive margin. The Skinner Cove Formation is an ∼800 m thickness of well-bedded volcaniclastic rocks and lava flows dipping ∼70° to the southeast, fed by subvolcanic dykes (that become subvertical when tilt-corrected). The volcanics are a differentiated alkali…	Grenville basement is unconformably overlain by upper Neoproterozoic arkoses, conglomerates, quartzites, graywackes, and columnar and pillowed lavas. The succeeding Cambrian to Ordovician platformal sequence is one of the world's classic miogeoclinal prisms.
A20 (a,b)	Laurentian craton, E side, E Greenland (a) and NE Svalbard (b)	Greenland, Svalbard	815	444	370*	C	1740	none	-	In both northeast Svalbard and East Greenland, the Neoproterozoic successions begin with clastics inferred to be related to rifting. Next come platformal carbonates and the section is completed by approximately 1 km of glaciogenic strata. The glaciogenic strata, in turn, are overlain by the Cambrian and Ordovician carbonates that are generally viewed as passive margin deposits.
A21	Baltic Craton, W side, Scandinavian Caledonide orogen	Norway	605	505	100	A	1550	moderate	The Sarektjåkkå Nappe has two main components: a 4–5 km thick succession of rift-related sedimentary rocks (the Favoritkammen Group (FG), which is penetrated by a suite of tholeiitic dykes (the Sarek Dyke Swarm) constituting 70–80% of the nappe (https://doi.org/10.1016/S0301-9268(01)00189-9).	The polymetaphoric Seve Nappe Complex (SNC) of the Scandinavian Caledonides contains sequences representing the passive margin between continental Baltica and the lapetus Ocean. The Sarektjikki Nappe in the SNC consists of sedimentary rocks intruded by mafic dykes that constitute 70-80 per cent of the nappe and frequently form sheeted dyke complexes (https://doi.org/10.1002/gj.3350290403)
A22	Kola craton, S side, Kola suture belt	Russia	1970	1800	170	B	690	abundant	thick pile of trachybasaltic-trachyandesitic metavolcanics and ignimbrites with minor sedi- mentary intercalations.	The volcanic-sedimentary assemblage is indicative of deposition in shallow fault- controlled troughs with concurrent rift-type volcanism. https://doi.org/10.1016/0040-1951(86)90219-2
A23	Baltic craton, N side, Timanides	Russia	1000	560	440	C	1460	none	-	Predominantly terrigenous sedimentary successions of mainly Neoproterozoic age characterise the northeastern margin of Baltica (https://doi.org/10.1016/S0040-1951(02)00195-6)
A24	Baltic craton, E side, Uralian orogen, Phase 1	Russia	1000	620	380	B	1000	none	-	The Upper Riphean section (Karatau Group, ca. 1000 to 650 Ma) includes mostly siliciclastic rocks in the lower part and mostly carbonate rocks in the upper part
A25	Baltic Craton, E side, Uralian orogen, Phase 2	Russia	477	376	101	A	3130	moderate	Sakmara Allochthon where it is composed of Upper Cambrian(?) to Ordovician (Tremadoc) coarse-grained, poorly sorted conglomerate, sandstone and siltstone with a highly variable thickness, and interlayers of trachybasalt, rhyolite tuffs, minor limestone, and jasper (https://doi.org/10.1016/j.earscirev.2006.08.003)	The Paleozoic continental margin sediments that entered into the collision with the Magnitogorsk Arc in the Middle Devonian consisted of a thin veneer of Ordovician, Silurian, and Devonian sediments above the Precambrian basement (https://doi.org/10.1016/j.earscirev.2006.08.003)
A26	Baltic craton, S side, Variscan orogen	Ireland to Poland	407	347	60	A	1080	none	-	The Lower Carboniferous sedimentary rocks of the northern Rhenish Massif represent passive margin deposits (chert, shale, neritic, pelagic and turbiditic limestone of the “Kohlenkalk” and Culm facies) whilst synorogenic deposition of immature sand of polymictic greywacke composition prograded from the south to north (https://doi.org/10.1007/s00531-018-1628-4)
A27	Saxo-Thuringian block	Germany	444	344	100	B	400	moderate	Magmatic event at 490 and at 375 Ma. A Late Devonian magmatic suite, which ranges from diabase pillows, mafic dykes and picrites, demonstrates that this Devonian magmatism corresponds to within-plate magmatism (https://doi.org/10.1007/s00531-004-0413-8)	The passive margin phase is represented by earliest Silurian to Tournaisian (early Carboniferous) limestones and shales
A28	S margin of Europe, Alpine orogen	Switzerland	170	43	127	A	790	none	-	Cretaceous passive margin carbonates are unconformably overlain by the classic upward deepening, then progradational foreland-basin succession of Flysch, and then Molasse
A29	Pyreneean-Biscay margin of Iberia	Spain	115	70	45	A	390	none	-	Passive margin converted directly to a convergent margin. A full-fledged, enduring subduction zone never did form, as there is no magmatic arc and the margin eventually lapsed into inactivity.
A30	NW Iberia, Variscan orogen	Spain	475	385	90	B	210	moderate	The stratigraphic succession of the Manzanal del Barco Formation varies enormously and shows, locally, sills of basic igneous rocks with subophitic texture, rhyolites, and tuffaceous slates (https://doi.org/10.1130/0-8137-2364-7.17)	Early Ordovician gneissic volcanics are overlain unconformably by a siliciclastic platformal sequence whose basal unit, the Santa Eufemia Formation, begins in the early Arenig of the Early Ordovician. Silurian strata show evidence of soft-sediment deformation and include volcanic sills, flows, and tuffs. Devonian foreland basin deposits of flysch-like character are recognized in three thrust shee…
A31	Apulian microcontinent, Pindos ocean	Greece	230	60	170	A	630	none	-	Carbonate platform that was flanked to the east by the Pindos Ocean. Slope, rise, and abyssal facies of the Priolithos Group are regarded as having been deposited in this ocean. The passive margin endured until the Paleocene when terrigenous turbidites of the Pindos Flysch Formation mark collision between the Apulian passive margin and an accretionary complex to the east
A32	Isparta angle, western margin	Turkey	227	60	167	A	280	moderate	Continental rifting and dispersal of Gondwana-Land fragments apparently began in Late Triassic time, as indicated by the widespread presence in the eastern Mediterranean region of rift-related mafic to intermediate volcanic rocks interbedded with quartzose clastics, volcaniclastics, redeposited carbonates, and radiolarites of Upper Triassic age (https://doi.org/10.1029/93TC01060)	Carbonate platforms were established
A33	Isparta angle, eastern margin	Turkey	227	53	174	A	260	moderate	Continental rifting and dispersal of Gondwana-Land fragments apparently began in Late Triassic time, as indicated by the widespread presence in the eastern Mediterranean region of rift-related mafic to intermediate volcanic rocks interbedded with quartzose clastics, volcaniclastics, redeposited carbonates, and radiolarites of Upper Triassic age (https://doi.org/10.1029/93TC01060)	Carbonate platforms were established
A34	Arabia, NE margin, Oman-Zagros orogen	Oman, Iran	272	87	185	A	2300	none	-	Dominated by carbonates
A35	Alborz orogen	Iran	390	210	170	B	550	abundant	Mid-Ordovician to mid-Devonian mainly mafic volcanics about 1 km thick have been attributed to extension	A Neoproterozoic to Lower Ordovician platformal sequence of siliciclastics, carbonates, and minor tuffs is considered to predate rifting that led to the Alborz margin and may belong to an older passive margin. Mid-Ordovician to mid-Devonian mainly mafic volcanics about 1 km thick have been attributed to extension. Overlying mid-Devonian to Middle Triassic strata are predominantly carbonates and r…
A36	Siberian craton, N side, Taymyr, Phase 1	Russia	> 750	600	> 150	D	1380	none	-	The Taimyr ophiolites and island-arc complexes were formed around 750 Ma and emplaced onto the Arctic Siberia passive margin at 600 Ma.
A37	Siberian craton, N side, Taymyr, Phase 2	Russia	530	325	205	B	1380	moderate	Volcanic breccias and associated diatremes occur in the Olenek uplift, while pillowed basalts and rhyolitic conglomerates occur at sections 5 and 6 (https://doi.org/10.1086/629851)	Latest Vendian carbonates (Khorbosuonka Group) are regarded as belonging to a preexisting east-facing continental margin sequence along the Verkhoyansk sector. A paleokarst surface separates these strata from Lower Cambrian Nemakit-Daldyn strata which include interbedded conglomerate, sandstone, shale, limestone, and volcanic rocks
A38	Siberian craton, W side, Yenisei Ridge	Russia	1350	850	500	C	1910	none	-	The Korda Formation (1300–1600 m) is composed mainly of phyllitized biotite-bearing schists.Quartzites, crystalline limestones, metavolcanics, gravelstones, and conglomerates are subordinate and occur in the lower section. The Sukhoi Pit Group section consists of variegated limestones, dolomites, sandstones, argillaceous shales, and tuffaceous rocks. The Tungusik Group is composed of sandstones, …
A39	Gargan microcontinent, W side	Russia, Mongolia	Neoprot.	Neoprot	Unk	D	150	none	-	Classical platform composition: an Archaean–Early Proterozoic crystalline basement is unconformably overlain by the Neoproterozoic shelf deposits. The Irkut Formation consists of a thick-bedded dolomitic marble, up to 600 m thick, which contains chert beds, in places altered to quartzite. The Ilchir Formation conformably is composed of dark gray shale along with sporadic interbeds of fine-grained…
A40	Siberian craton, S side, Baikal	Russia	1000	600	400	C	1160	none	-	The passive margin succession consists of Neoproterozoic siliciclastic and carbonate rocks, including shelf facies in the north and slope facies in the south
A41	Dzabkhan block	Mongolia	710	580	130	B	200	none	-	Passive-margin carbonate sequence that evolved into a foredeep during the Tuva-Mongol arc-microcontinent
A42	Idermeg terrane	Mongolia	Neoprot.	Mid-Camb.	Unk	D	300	none	-	Marble, quartzite, conglomerate, sandstone, and limestone deposited on an older metamorphic basement
A43	Karakorum block	Pakistan	268	193	75	B	500	abundant	In the Tas Kupruk zone, near Lasht and Morich, basalt to latibasalt lavas and tufts several hundred metres thick are progressively metamorphosed towards the southwest. (https://doi.org/10.1016/S0037-0738(96)00068-1)	The Karakorum Block records a predominantly marine Ordovician to Cretaceous sedimentary history. Six major sedimentary cycles are recognised. The oldest sediments, Early Ordovician, transgress over a crystalline basement. The 1-km-thick Ordovician-Silurian mostly shaly succession contains rare carbonate intercalations. In the Early Devonian, a wide peritidal platform spread over the craton. Carbo…
A44	Tarim microcontinent, N side, Tien Shan orogen	China	600	380	220	C	1320	moderate	Basalt intervals are actually composite intervals of interbedded basalt and siliclastic sedimentary rocks (https://doi.org/10.1130/0-8137-1194-0.47)	Neoproterozoic through Middle Ordovician megasequence that includes rift-related clastic and volcanic rocks, and overlying platformal carbonates
A45	Tarim microcontinent, S side, Kunlun orogen	China	600	430	170	B	950	none	-	Precambrian gneisses are overlain by a weakly metamorphosed succession of late Neoproterozoic carbonates and oceanic tholeiites, as well as lesser shales, marls, and tuffs
A46	Indian craton, N side, Himalayan orogen, Phase 1	India, Nepal	635	502	133	A	2460	moderate	Rift-related mafic volcanic rocks and tuff/tuffaceous sandstone are present (doi: 10.1046/j.1365-3091.2003.00589.x)	The Infra Krol Formation and Krol Group are part of a Neoproterozoic and Lower Cambrian succession more than 12 km thick. The lower half of this succession consists of quartzite, sandstone, argillite, carbonate rocks, and minor mafic volcanic rocks of uncertain age, but younger than 1 Ga, and possibly rift related. The upper half of the succession begins at an unconformable contact with as much a…
A47	Indian craton, N side, Himalayan orogen, Phase 2	India, Nepal	271	52	219	A	2460	moderate	Tholeiitic basalts were in fact erupted along the Tethys Himalaya soon after this “upper plate” rifted margin experienced initial submergence of rift shoulders and sediment starvation. (https://doi.org/10.1016/S1367-9120(99)00008-5)	Visean (Early Carboniferous) to Sakmarian (Early Permian) rifting is recorded by thick siliciclastic sequences in extensional basins and by bimodal, alkalic volcanism. The initiation of seafloor spreading and the rift-drift transition are marked by Artinskian to Kungurian (Early Permian) tholeiitic basalts and by submergence of rift shoulders
A48	Aravelli-Delhi orogen	India	2000	1800	200	C	740	moderate	The basal Delwara Formation is made up of an intercalated sequence of metabasaltic rocks and wellsorted feldspathic quartzites that were probably deposited in a shallow marine rift basin (https://doi.org/10.1080/00206814.2014.999355)	Matoon Formation is a thick succession of shallow-marine platform carbonates, which defines the passive margin itself
A49	South China Craton, NW side, Longmen Shan orogen, Phase 1 (ended by re-rifting)	China	600	300	300	C	480	none	-	The lower part of the Sinian succession consists of many different facies that include terrestrial red conglomerate, sandstone, and shale, with interbedded intermediate, basic, and acidic lavas and associated volcaniclastic rocks, terrestrial volcaniclasitc rocks, and tuffs, as well as terrestrial acidic and minor intermediate volcanic rocks. The younger Sinian sedimentary succession rests unconf…
A50	South China Craton, NW side, Longmen Shan orogen, Phase 2	China	300	228	72	B	480	abundant	The late Permian Emeishan large igneous province (ELIP) covers ∼0.3 × 106 km2 of the western margin of the Yangtze Block and Tibetan Plateau with displaced, correlative units in northern Vietnam (Song Da zone) (https://doi.org/10.1016/j.gsf.2013.07.003). The basalts reach more than 500 m (1600 ft) in thickness and were extruded in a terrestrial environment. (https://doi.org/10.1306/03230605076)	Permian rocks are about 400 to 800 m thick and consist mainly of shallow-water limestone and dolomite, typically with some sandstone and conglomerate at the base of the sequence. In Late Permian time, there was extensive extrusion of basalt (Emei Shan basalt) in the southwestern part of the region. The basalts reach more than 500 m thickness, were extruded in a terrestrial environment, and are in…
A51	North China craton, Central orogenic belt	China	2740	2530	210	C	900	abundant	4500 m of mafic rocks of Wutai Formation	4500 m of mafic rocks of Wutai Formation overlain by shallow-water deposits of the Hutue Formation.
A52	South China Craton, N side, Qinling–Dabie orogen, Phase 1	China	750	440	310	C	560	moderate	Widespread bimodal igneous suite in the rifting sequence	Basement rocks in this area are extensively intruded by both mafic and felsic dikes, sills and small plutons beneath the unconformably overlying Sinian clastics. Sinian clastics in the Wudang and Daba Shan pass stratigraphically upward into younger Sinian, Cambrian, Ordovician and Silurian strata that constitute a 5 to 8 km thick Early Paleozoic passive-type shelf sequence (https://doi.org/10.101…
A53	South China Craton, N side, Qinling–Dabie orogen (2)	China	360	235	125	C	560	none	-	A breakup unconformity separates Devonian rift-related rocks from Carboniferous-Permian drift-related strata on the new northern edge of the South China craton
A54	South China craton, SE side, Nanling orogen	China	635	445	190	B	1730	moderate	Neoproterozoic rift-related rocks are widespread across the craton and include granites, mafic-ultramafic plutons, and sedimentary-volcanic rift sequences	Neoproterozoic rift-related rocks are widespread across the craton and include granites, mafic-ultramafic plutons, and sedimentary-volcanic rift sequences. The rift-drift transition is thought to correspond to the next higher unit in the stratigraphy, the glaciogenic Nantuo Formation. Above the glacial deposits is a widespread platform-carbonate sequence that was deposited across both the South C…
A55	China, E side, Taiwan orogen	Taiwan	28	5	23	A	500	moderate	Deep-water syn-rift sediments recovered by the ODP near the COB indicate that volcanism was submarine and that rifting culminated in a mass wasting event that marks a break-up unconformity. The average extension in South China Sea is much less than that seen in the extreme 'non-volcanic' Iberian margin. The South China margin may represent an intermediary form of continental extension between the…	Rift-drift transition at ca. 28 Ma based on seismic reflection profiles calibrated by nanofossils at ODP Site 1148. A forebulge unconformity at the Miocene-Pliocene boundary (5 Ma) marks the onset of collision
A56	Siberian craton, E side, Verkhoyansk orogen, Phase 1	Russia	1600	1010	590	C	1700	abundant	The Ulkan succession consists of quartz sandstone of the Toropkinsk Formation (200 m), trachybasalt and minor sandstone of the Ulkachan Formation (750 m), and liparite and dacite with some trachybasalt, conglomerate and sandstone of the uppermost El'geteisk Formation (2140 m) (https://doi.org/10.1016/j.tecto.2003.06.001). A rifting event that occurred at ca. 1000–950 Ma is well documented by volu…	The ca.1600–1050 Ma miogeoclinal succession in the south (Uchur, Kerpyl, and Lakhanda Groups) depositionally overlies a rift (Ulkian succession) containing volcanic rocks as young as 1676 Ma. The Uy Group has yielded detrital zircons as young as 1070±40Ma, and is intruded by mafic sills that are as old as 1005 Ma
A57	Siberia, E side, Verkhoyansk, Phase 2 (ended by re-rifting)	Russia	650	380	270	C	1700	none	-	>600-m-thick carbonate succession (Khorbosuanka Group). The Neoproterozoic to Devonian phase of passive-margin evolution ended not with collision, but with re-rifting. Rifting began in theMiddleDevonian in the Sette-Daban zone and was widespread along the Siberian craton's easternmargin by the Late Devonian
A58	Siberia, E side, Verkhoyansk, Phase 3	Russia	380	160	220	C	1700	abundant	A Devonian rifting event is widespread throughout the east margin of Siberian craton. Numerous tholeiite and alkaline basalt flows are intercalated with conglomerate, sandstone, evaporite and carbonate units in coarsening-upward cycles (https://doi.org/10.1016/S0040-1951(03)00016-7)	Numerous tholeiite and alkaline basalt flows are intercalated with conglomerate, sandstone, evaporite and carbonate units in coarsening-upward cycles. These were deposited in continental to lagoonal and shallow-marine environments that are characteristic of rift successions. Domain-bounding faults juxtapose the upper part of the Lower Carboniferous limestone with the lower part of the Lower to Mi…
A59	Guaniguanico terrane	Cuba	159	80	79	A	150	abundant	The El Sábalo Formation occurs in the Northern Rosario belt. This unit, up to 400 m thick, consists of basalts and diabases with interbedded limestones, marls and sometimes shales. These horizons of pyroclastic rocks also have been observed. The basalts are massive or pillowed flow (https://doi.org/10.1016/S1874-5997(99)80038-0)	Carbonate-dominated Mesozoic sequence
A60	S. American Craton, N side, Venezuela margin	Venezuela	159	34	125	A	1080	none	-	The age of the rift-drift transition is based mainly on a comparison with the Guaniguanico terrane of Cuba. In Venezuela, the transition from passive margin to foredeep is marked by a rapid increase in the rate of subsidence at around the Eocene-Oligocene boundary
A61	Amazon craton, SE side, Araras margin, Paraguay orogen	Brazil	640	580	60	B	470	none	No rift-related deposits have been documented.	Ediacaran Araras Formation, an eastward-facing, eastward-deepening platform carbonate succession preserved on the craton and within the orogen. The Araras Formation overlies glaciogenic strata—the Puga Formation on the craton and the Cuiabá Group in the fold belt.
A62	Cuyania terrane, Argentine Precordillera, E side	Argentina	530	473	57	A	640	none	Its main characteristic is the thick succession of lower Paleozoic rocks and the absence of volcanic or pyroclastic deposits, except for Ordovician pillow lavas and mafic-ultramafic sills located along the western edge of the belt (https://doi.org/10.1130/0016-7606(1995)107<0253:TEPEOT>2.3.CO;2)	The Cambrian-Ordovician platformal succession of the Cuyania terrane, Argentine Precordillera is strikingly similar to that in the Appalachian-Ouachita system. Red siltstones and shales interlayered with evaporites and dolomites representing marginal marine sabkhas underlying the Lower Cambrian. These might be interpreted as initial rift sequences. Alternating limestones, shales, and siltstones o…
A63	Sao Francisco craton, W side, Brasiliano orogen	Brazil	745	640	105	B	1080	none	-	The Paranoá Group is a ca. 1,600m thick megasequence limited by major unconformities. Its basal rudaceous layers locally overlies the Statherian Araí Group, whereas its uppermost erosive boundary is overlain either by the Sturtian-age diamictites (Jequitaí Formation) or by post-Sturtian (Upper Cryogenian) carbonates of the Bambuí Group. (Campos Neto M.C. 2000. Orogenic systems from southwestern G…
A64	Sao Francisco craton, E side, Aracauai–Ribeira orogen	Brazil	900	590	310	B	750	moderate	An extensional event, recorded by intrusion of mafic dyke swarms and anorogenic granites within the São Francisco-Congo palaeocontinental region, ran from the end of the Mesoproterozoic to the begining of the Neoproterozoic. The mafic magmatism related to this rifting episode lasted at least until 906 Ma (DOI:10.1016/S0301-9268(01)00174-7)	Rift- and subsequent passive-margin sedimentation are recorded by the glacially influenced Macaúbas Group. Macaúbas formations are grouped into a proximal unit, comprising preglacial and glaciation-related deposits, and a distal unit including Salinas Formation and its correlatives. The continental-rift stage of the Macaúbas Basin is recorded by preglacial sequences, consisting of sandstone, cong…
A66 (a,b)	Sierra de la Ventana (a), Cape (b)	Argentina, S. Africa	500	300	200	B	2170	none	-	In Argentina, Cambrian rift-related igneous rocks (granites and rhyolites) range from 531±4 to 509±5 Ma. An overlapping sequence of Ordovician to Devonian marine siliciclastic strata represents the thermal subsidence phase of the inferred passive margin. In Cape Fold Belt of South Africa, alluvial fan facies of the Kansa Subgroup are interpreted as rift deposits. The overlying Table Mountain Grou…
A66 (c)	Ellsworth Mtns. (c)	Antarctica	500	300	200	B	2170	moderate	Middle Cambrian sedimentary rocks of the southern Ellsworth Mountains host locally thick volcanic and subvolcanic rocks forming five igneous centres. Geochemically, most of the igneous samples are mafic, with a subordinate suite of evolved types. The mafic suite is geochemically varied, ranging from MORB (mid-ocean ridge basalt)-like compositions to shoshonitic and lamprophyric. The sedimentary f…	In Ellsworth Mountains of Antarctica., rifting is represented by the Lower? and Middle Cambrian Hertitage Group, which includes volcanic rocks that have extensional geochemical signatures. Next came a silicilclastic-dominated passive margin, represented by the Upper Cambrian to Devonian Crashsite Group.
A67	West African craton, N side, Anti-Atlas orogen	Morocco	800	580	220	C	560	abundant	The Taghdout Group is associated with a swarm of doleritic dykes, sills and irregular sheet-like bodies that form a network of intrusions into the Zenaga Complex and sills within the lower part of the Taghdout Group. These rocks, geochemically akin to continental tholeiites are termed the Ifzwane Suite and are thought to be associated, along with the lower basalts of the Taghdout Group (Agouniy F…	The passive margin succession is assigned to the Taghdout Group. The broad succession is basalt, dolomite–jaspilite and quartzite, together several kilometres thick (https://doi.org/10.1016/S0301-9268(02)00075-X)
A68	West African craton, W side, Mauritanide orogen	Mauritania	675	650	25	C	1692	none	-	Three unhappy consequences of the polyorogenic history are that the deposits of the passive margin phase are now tectonites, that the original paleogeographic relations and affinities of rock units are obscure
A69	West African craton, E side, Dahomeyide orogen	Ghana, Mali	1000	625	375	C	2200	none	-	At the base, the 1-km-thick Boumbouaka Supergroup (ca. 1100 to ca. 700 Ma) is regarded either as the fill of an epicontinental cratonic basin or as rift-related. It is composed of sandstone, microconglomerates, siltstones, shales and limestone lenses (DOI:10.4314/gjgs.v8i1.53810) The overlying Penjari (or Oti) Supergroup, about 2.5-km thick, includes tillites, various other siliciclastic rocks, a…
A70	LATEA craton, Hoggar, W side	Algeria, Mali	Unk	870	Unk	D	840	NA	NA	Early events in the evolution of this hypothesized margin have not been documented, and the start date is unconstrained
A71	LATEA craton, Hoggar, S side	Algeria, Niger	Unk	685	Unk	D	550	NA	NA	Early events are unconstrained and a start date cannot be set
A72	East Africa Orogen, W side	Sudan	840	730	110	C	1460	none	Whereas the lower crust of the northern EAO is mafic igneous rock, southern EAO granulites include a variety of igneous and metasedimentary rocks, including marbles and quartzites. These differences indicate the different histories of the northern EAO, dominated by igneous processes and relatively mild terrane accretion events, and that of the southern EAO, the focus of continental collision betw…	Polydeformed slope- and basin-facies carbonate rocks are assigned to this passive margin
A73	Congo Craton, W side, Kaoko Belt (N Coastal Branch) of Damara orogen	Namibia	780	580	200	A	2175	none	-	Siliciclastic rocks of the Nosib Group to carbonate rocks of the Ombombo Subgroup of the Otavi Group
A74	Congo Craton, S side, Inland Branch, Damara orogen	Namibia	670	555	115	A	1800	none	-	The rift-drift transition is placed between the Gruis and Ombaatjie Formations (carbonates and clastics). The passive margin itself was the site of a long-lived, 3-km-thick carbonate platform: the Tsumeb Subgroup of the Otavi Group
A75	Kalahari Craton, N side, Inland Branch, Damara orogen	Namibia	670	550	120	A	540	none	-	The passive-margin succession is represented by the Witvlei Group carbonate platform
A76	Kalahari Craton, W side, Gariep Belt, (S Coastal Branch) of Damara orogen	Namibia	735	535	200	A	690	moderate	Variety of volcanic and pyroclastic rocks related to bimodal, predominantly felsic ~750 Ma magmatism (https://doi.org/10.2113/108.1.19)	Rifting is recorded by the Rosh Pinah Formation, which consists of lacustrine and alluvial fan facies and bimodal volcanic rocks. An overlying transgressive sequence of shallow-water carbonates and siliciclastics is interpreted to record post-rift, thermal subsidence of the passive margin
A77	Kaapvaal Craton, W side	S. Africa, Botswana	2640	2470	170	C	810	abundant	The Ventersdorp Supergroup exemplifies the largest and most widespread sequence of volcanic rocks on the craton, consisting of a 5100 m thick sequence of sub-aerial volcanic rocks with sedimentary units attaining a thickness of up to 2900 m in boreholes (https://doi.org/10.1016/0899-5362(91)90045-Z)	The Ventersdorp Group which consists of komatiites, continental flood basalts, chemical and clastic sedimentary rocks, and felsic volcanic rocks, has been interpreted to have been deposited during the initial rifting along this margin. Rocks of the overlying Schmidtsdrif and Campbellrand Subgroups are interpreted to represent the thermal subsidence phase of passive-margin sedimentation. These str…
A78	Zimbabwe craton, S side, Belingwe greenstone belt	Zimbabwe	ca. 2600	ca. 2600	Unk	D	60	abundant	Reliance and Zeederbergs Formations, consisting of nearly 4 km of basalt, komatiite, minor andesite, and some sedimentary rocks.	The Manjeri Formation consists of up to 250 m of fluvial to shallow marine conglomerate, sandstone, siltstone, banded iron formation, and limestone. The Manjeri Formation is overlain by a volcanic-dominated succession assigned to the Reliance and Zeederbergs Formations, consisting of nearly 4 km of basalt, komatiite, minor andesite, and some sedimentary rocks. The uppermost strata in the Ngezi Gr…
A79	Australian craton, NW side, Timor orogen	Indonesia	151	4	147	A	1530	none	-	Modern trench sediments depositionally overlie Pliocene shallow-marine carbonates
A80	Australian craton, NE side, New Guinea orogen	New Guinea, Irian Jaya	180	26	154	A	1380	none	-	Rifting during the Triassic and the Early Jurassic led to the formation of a passive margin along the northern edge of the Australian craton. A siliciclastic sag phase sequence was draped across this margin during the Jurassic and Cretaceous. A second phase of rifting in the Late Cretaceous dismembered the eastern part of the margin and led to the opening of the Coral Sea Basin and another contem…
A81	Northwest Australia craton, Halls Creek orogen	Australia	1880	1860	20	C	270	abundant	The Biscay Formation mainly consists of massive metabasaltic lava flows (some with brecciated flow tops), laminated mafic volcaniclastic deposits, fragmental deposits and, locally, pillow lavas. Many of the fragmental rocks have a carbonate matrix. The volcanic rocks are interlayered with minor carbonate, and pelitic and psammitic rocks. The thickness of the Biscay Formation is not known, owing t…	The Halls Creek Group consists of the Saunders Creek Formation, the Biscay Formation and the Olympio Formation. At the base of the Halls Creek Group, up to 150 m of cross-laminated, medium- to coarse-grained meta-quartz sandstone and meta-feldspathic sandstone comprising the Saunders Creek Formation unconformably overlies granite and metavolcanic rock dated at ca 1910 Ma. The Biscay Formation mai…
A82	Rudall Complex	Australia	> 2000	1780	> 220	D	330	moderate	The Connaughton terrane consists of mafic gneiss and schist derived from tholeiitic basalts, and paragneiss derived from chemical and clastic sedimentary rocks (Bagas, 2004); this assemblage has been interpreted as the pre-collisional eastern passive margin of the Plbara craton	The Rudall Complex of Western Australia preserves the deformed and metamorphosed remnants of a Paleoproterozoic passive margin. Two principal terranes make up the Rudall Complex: the Talbot and Connaughton terranes. The Connaughton terrane consists of mafic gneiss and schist derived from tholeiitic basalts, and paragneiss derived from chemical and clastic sedimentary rocks. Metamorphosed quartzit…
A83	Pilbara Craton, S margin, Ophthalmian orogen	Australia	2685	2445	240	B	580	abundant	The 7-km-thick Fortescue Group, mostly mafic lavas plus some siliciclastic rocks, has been interpreted as the product of two successive, differently oriented rifting events	Most of the passive-margin succession belongs to the Hamersley Group and consists of iron formations, limestones, and mudstones
A85	Australia, E side, Tasman orogen	Australia	590	520	70	B	1670	moderate	Around 600 Ma, attenuation and eventual rifting of Proterozoic continental crust resulted in formation of a thinned passive continental margin transected by small rift basins in which rift tholeiites transitional to MORB accumulated (https://doi.org/10.1016/0040-1951(92)90189-D)	The Crimson Creek Formation in the Dundas Trough is an unfossiliferous, latest Precambrian or Early Cambrian turbidite sequence dominated by volcanogenic lithic wackes and laminated siltstones, with abundant red and yellow mudstone and flows of tholeiitic basalt. It conformably overlies shallow-water, passive contnental margin siliceous and dolomitic sediments of the Success Creek Group. In the S…
A86	Carajás Mineral Province, Amazon Craton	Brazil	2780	2740	40	A	300	abundant	3 km thick Basalts and BIFS of Carajás Formation	Basalts and chemical sedimentary rocks of Carajás Formation overlain by siliciclastic rocks (pelites and psmamites) of Grão Pará Group
*supplementary table modified from Bradley (2008)

## Sheet: Graph
Margin	From	To	Lifespan		*Approximate ages
A10*	3002	2870	132
A51	2740	2530	210
A83	2685	2445	240
A77	2640	2470	170
A65	2500	2130	370
A12	2300	2065	235
A17	2175	2010	165
A15	2135	1890	245
A7	2090	1970	120
A9	2070	1880	190
A13	2065	1880	185
A6	2015	1883	132
A11	2000	1780	220
A14	2000	1875	125
A48	2000	1800	200
A82*	2000	1780	220
A22	1970	1800	170
A84	1900	1740	160
A81	1880	1860	20
A16*	1876	1859	17
A56	1600	1010	590
A38	1350	850	500
A8	1255	1200	55
A23	1000	560	440
A24	1000	620	380
A40	1000	600	400
A64	900	590	310
A72	840	730	110
A20 (a,b)*	815	444	370
A67	800	580	220
A73	780	580	200
A69	775	625	150
A36*	750	600	150
A52	750	440	310
A63	745	640	105
A76	735	535	200
A3	710	385	325
A41	710	580	130
A68	675	650	25
A74	670	555	115
A75	670	550	120
A57	650	380	270
A61	640	580	60
A46	635	502	133
A54	635	445	190
A5*	620	444	180
A21	605	505	100
A44	600	380	220
A45	600	430	170
A49	600	300	300
A85	590	520	70
A2	545	435	110
A4	542	357	185
A19 (a, b)	540	465	75
A37	530	325	205
A62	530	473	57
A18	520	310	210
A66 (a,b)	500	300	200
A66 (c)	500	300	200
A25	477	376	101
A30	475	385	90
A27	444	344	100
A26	407	347	60
A35	390	210	170
A58	380	160	220
A53	360	235	125
A1	350	170	180
A50	300	228	72
A34	272	87	185
A47	271	52	219
A43	268	193	75
A31	230	60	170
A32	227	60	167
A33	227	53	174
A80	180	26	154
A28	170	43	127
A59	159	80	79
A60	159	34	125
A79	151	4	147
A29	115	70	45
A55	28	5	23
A70	Unk	870	Unk
A71	Unk	685	Unk
A39	Neoprot.	Neoprot	Unk
A42	Neoprot.	Mid-Camb.	Unk
A78	ca. 2600	ca. 2600	Unk
